# Supplementary material for: Assessing the influence of French vaccine critics during the two first years of the COVID-19 pandemic
Source: PubMed Central journal article supplement (PMC9352068; doi:10.1371/journal.pone.0271157), 2022-08-04
Supplement: pone.0271157.s001.pdf [file pone.0271157.s001.pdf]

Response to Reviewers' comments on:  
'Assessing the influence of French vaccine critics during the two first  
years of the COVID-19 pandemic'  
by M. Faccin, F. Gargiulo, L. Atlani-Duault and JK Ward  
June 3, 2022

We thank the editor and the reviewers for the careful evaluation of this manuscript. In particular, we noticed the recognition of the manuscript value and soundness, despite the lack of some important details. We spent a lot of effort in clarifying the more obscure passages suggested by the reviewers and extending deficient parts. Specifically we extended and clarified the *Methods and Data* section, with attention to explicitly reports all steps.

We considered all relevant reviewer comments and replied to each of them in the following. We attach a document highlighting the differences from the previous submission (as compiled by `latexdiff`).

on behalf of the co-authors  
*Mauro Faccin*

## **Comment 1.1.**

In this paper, the authors analyze the debates over the COVID-19 vaccine on the French-speaking segment of Twitter. First, they study the evolution of vaccine-related debates. They show that specific events increase the reach of the vaccine-critical activists on social media, but this information flow is relatively limited compared to mainstream media. Second, they analyze the community structure of discussions and examine how information flow between communities. Authors conclude that the largest far-right community is the echo chamber of conspiracy theorists. In contrast, a smaller community that consists of far-left actors is more capable of communicating vaccine-critical content to a broader public.

They assess the evolution of user engagement using a model similar to the SIS network epidemic model. Here, users that share vaccine-critical information are analogous to infectious individuals in the SIS model. Furthermore, their community analysis relies on hypergraphs derived from retweet data. Hypergraph helps differentiate a user who is retweeted N times for a single tweet and a user whose N tweets are individually retweeted one single time, which is crucial for capturing the dynamics of the information flow.

In conclusion, I think this paper presents a rigorous analysis of vaccine hesitancy on Twitter during the COVID-19 pandemic. I think the methodology is accurate, and the results are significant.

## **Response 1.1.**

We thank the reviewer that sees an important and rigorous contribution to the literature in this manuscript.

## **Comment 1.2.**

(1) To the best of my understanding, "vaccine-critical URLs" refer to websites other than mainstream media. For example, websites of prominent actors in vaccine controversies. It may be helpful for the reader if this is reminded in the data subsection.

## **Response 1.2.**

As suggested by the reviewer we clarified the content of the URLs of interest in the Data section.

## **Comment 1.3.**

(2) "we searched our database for those URLs" is the database refer to dataset DataCovVac?

## **Response 1.3.**

As this passage was unclear, we clarified which database we refer (indeed the DataCovVac database) in the main text.

## **Comment 1.4.**

(3) I could not fully follow how the co-occurrence network is used to label URLs automatically? Did you also propagate the labels of media URLs to closest neighbors? It appears it is performed only

for 285 vaccine-critical URLs. If this is the case, it is not clear how 382 media URLs were obtained from the initial 50 URLs.

I think that a figure (e.g., a flowchart) that explains the data collection process might be helpful. However, this is not a necessity.

**Response 1.4.**

The passage describing the database construction has been clarified and corrected in the main text. We started from an initial seed of 285 + 50 URLs and found its dilation in the co-shared network of URLs. From this set, we visited each website and manually classified it to either vaccine-critical or news media or others (which we discarded).

Finally we published the code online at [github.com/maurofaccin/DataCovVac](https://github.com/maurofaccin/DataCovVac)

**Comment 1.5.**

I think the authors could mention the motivation behind using hypergraph instead of a standard retweet network earlier in the method section. I think it is a crucial choice, and the reason is explained in the middle of the results section.

**Response 1.5.**

As suggested by the reviewer we added in the method section a paragraph on the motivations of hyper-graph choice, which depends on the lack of knowledge of the exact retweet cascade structure and on the ability to distinguish users with many less retweeted tweets from users with few highly retweeted tweets.

**Comment 1.6.**

Sometimes the COVID-19 outbreak is mentioned as an epidemic, while it is sometimes referred to as a pandemic. Is there a nuance based on the context, or are the words "epidemic" and "pandemic" used interchangeably? For example, the title says "COVID-19 pandemic" and the abstract says "COVID-19 epidemic" this might confuse the reader.

**Response 1.6.**

To avoid any ambiguity we normalized the use of "pandemic".

## **Comment 2.1.**

In this study, the authors investigated the influences and spreading of vaccine-critical content on social media. They focused on Twitter data and applied network analysis tools to answer two questions: (1) Did vaccine-critical contents exhibit a "rise" during the COVID breakout? (2) What are the roles that different communities (groups of closely-connected Twitter users) play in the flow of vaccine-critical information.

Generally, the draft is clear about the questions and the general approaches through which these questions can be answered. Nevertheless, it could be improved in its technical soundness and presentation details.

## **Response 2.1.**

We thank the reviewer for spotting the manuscript potential and for helping us to improve its soundness and rigorousness.

## **Comment 2.2.**

1. In the abstract, one of the questions is formulated as "Who were the central actors in the diffusion of these (vaccine-critical) contents?". It doesn't seem that this question can be fully answered by the corresponding conclusion "the largest right-wing community has typical echo-chamber behavior... The smaller left-wing community is less permeable ..., but has a large capacity to spread it once adopted." For example, are these two communities the central actors? What about the rest of the communities identified? Are they less central? Why? To ensure that the question matches with conclusions, I suggest that this research question be re-formulated.

## **Response 2.2.**

We thank the reviewer for rising this source of confusion. Our aim was to study and analyse the influence of those communities in the diffusion of vaccine-critical content, without referring to any notion of centrality (measure of betweenness or random walk centrality for example.) We amended all parts of the text referring to this concepts. On the other hand, those two communities are the main actors in the diffusion of such contents, in fact they have the highest probability of being traversed by a tweet (visiting probability) while displaying, in the left-wing case, a non negligible ability to reach other communities (escape probability).

## **Comment 2.3.**

2. In "Results: The mesoscale structure of the information flow", it is not clear how the two metrics -- the escape probability and the average visit probability, are calculated. This problem is partially due to limited details in the description of behaviors of the random-walker in the Method section. Different definitions could lead to very different interpretations of the results. a. Especially, the definition of average visit probability -- "the probability (for a random walker) to visit a node of a given community" could have various explanations. For example, do we assume here the random-walker has an equal probability to start from any nodes in the network and take only one step? Or, we let the random-walker randomly walk for a large number of steps (so that the position of the

random walker follows a stationary distribution) and aggregate the result from this simulation? b. The escape probability also suffers (but potentially less) from the same issue. We probably know that the random walker is located in a community. However, do we assume the random walker has an equal chance to start from any nodes in the community? Or node with a higher out-degree in a community has a higher chance to be a starting point?

**Response 2.3.**

The characterization of the random walk considered in this manuscript is described in the Methods, in particular in the *Dynamics and hyper-graphs* subsection and is as follows. At a given time, the random walk resides on a node (a user of Twitter). From this node the random walk choose with an even probability one of the hyper-edges incident to the node by its tail (any of the tweets produced by that user). Once selected the hyper-edge, the random walker select one of the head nodes with even probability. This let us define the transition probability  $p(j|i)$ , and the visiting probability of each node  $p(i)$  is computed at the steady state by an iterative algorithm. The community transition matrix is:

$$p(C'|C) = \frac{\sum_{i \in C', j \in C} p(j|i)p(i)}{\sum_{i \in C} p(i)} \quad (1)$$

From here one can compute the visiting probability of community  $C$  as  $\sum_{i \in C} p(i)$  and its per-user average value as  $\sum_{i \in C} p(i) / |C|$ . The escape probability from community  $C$  is defined as

$$p(\bar{C}|C) = \sum_{C' \neq C} p(C'|C) \quad (2)$$

We have clarified the Methods section to contain these definitions.

**Comment 2.4.**

1. In "Methods: Measuring the engagement dynamics",  $N_t$  is defined as the total number of active users. What's the definition of an active user?

**Response 2.4.**

We clarify in the text that in the context of engagement analysis, active users are those that tweet or retweet on that day.

**Comment 2.5.**

2. In the same section, are there supportive arguments for the specific selection of the engagement window to be 3 days? Would the result significantly change if we slightly vary this parameter?

**Response 2.5.**

We thanks the reviewer for rising this question. The results are robust as long as the time window is kept small, less than a week. On the other hand, for the purpose of computing the engagement of users in a social network whose dynamics are fast-paced, a short time-window would better capture how it changes. We mentioned the robustness of the method on the Methods section.

**Comment 2.6.**

3. In Fig. 3, the y-axis label on the left doesn't make much sense. I suppose that both of blue and orange curves correspond to the number of users engaging with vaccine-critical content and news media, correspondingly. Given that the orange curve has the label "Media", the blue curve should have the label "Vaccine-critical" instead of "Engaged".

**Response 2.6.**

We thank the reviewer for spotting this labeling inconsistency which has been amended in the new version of this manuscript.

**Comment 2.7.**

4. In Fig. 6 & 7, what does the size of each circle refers to? size of each community? Please put this information in the caption of the figure to ensure clarity.

**Response 2.7.**

We have fixed the lack of information spotted by the reviewer.

## Comment 3.1.

The manuscript is partly technically sound. The selected data collection mechanism and analysis methods are suitable for addressing the research questions. Some parts in the Data and methods and Results sections need more detailed explanation:

- The APIs used in data collection are not mentioned
- There are not details on what the dataset contains (e.g. tweet ids, tweet text, number of retweets, user ids, etc.)
- The words used for the queries, how you decided to use those and which are the words?
- The qualitative analysis of the users profiles to distinguish to left or right-partite.
- There is no information within the manuscript about whether the dataset, scripts to collect the data, scripts for analysis are available for the replication of the results or future works.

## Response 3.1.

We thank the reviewer for recognizing the value of the manuscript.

Following the reviewer suggestion we clarified and added details to various passages of the article.

- We already mentioned that we used both *search* and *stream* APIs; we additionally referenced other papers where an in-depth description of the dataset extraction is discussed and upload the list of used keywords to a public repository at [github.com/maurofaccin/Data-CovVac](https://github.com/maurofaccin/Data-CovVac).
- We feel that the list of metadata contained in the extracted dataset would distract the reader from the main message of the article, we choose not to report this.
- For what concern the keywords used in the dataset extraction, the complete list has been uploaded to a public repository and referenced in the main text. Those keywords were selected based on previous analysis which has been explicitly referenced in the main text.
- We amended the main text shortly mentioning the availability of the dataset and the software used to extract it. The full dataset cannot be shared due to current Twitter policies, but a list of tweet IDs can be provided upon request.

## Comment 3.2.

The findings of this work are well supported by the data both from within the text and the figures. The paper structure, writing style, and language is appropriate for a research manuscript.

## Response 3.2.

We thank the reviewer for recognizing the soundness of the manuscript.

**Comment 3.3.**

1. explain the selection of 3 days time window for  $\tau$ , in Measuring the engagement dynamics section.

**Response 3.3.**

We added a deeper discussion on the choice. Particularly we stress the robustness of the analysis on the modification of the temporal window.

**Comment 3.4.**

2. add the references for "compartmental models" and SIS model in epidemiology

**Response 3.4.**

We added a reference for the SIS model and related theoretical results.

**Comment 3.5.**

3. define how they can say that an engaged user loses interest in  $\beta$  calculation

**Response 3.5.**

We clarified how the calculation works.

In particular, at any day  $t$  we can compute the following quantities from the dataset:

$E_t$  the number of users that shared a link from the set of URLs within the time frame  $(t - \tau, t]$ ;

$N_t$  the number of users that tweeted anything within the time frame  $(t - \tau, t]$ ;

$dE_t^+$  the number of users that were engaged at time  $t - 1$  but uncommitted at time  $t$ ;

$dE_t^-$  the number of users that were uncommitted at time  $t - 1$  but engaged at time  $t$ ;

from the above and Eq. 1 and 2 in the manuscript, one can estimate the engagement and disengagement rates  $\alpha_t$  and  $\beta_t$  at any time  $t$  and consequently the reproduction number  $R_t$  from Eq. 4.

**Comment 3.6.**

4. explain more the community detection method in the section "Community detection".

**Response 3.6.**

We clarified how the communities were computed, focusing in how the stability algorithm was used in our case.

**Comment 3.7.**

5. There is a typo in Results section, first sentence, there is the word "weather" instead of "wether"

**Response 3.7.**

This typo has been fixed.
